# Supplementary material for: Fluorescence resonance energy transfer-based DNA framework assembled split G-quadruplex nanodevices for microRNA sensing
Source: Royal Society of Chemistry journal article supplement (doi:10.1039/d0cc06054b), 2020-01-01
Supplement: d0cc06054b1.pdf [file d0cc06054b1.pdf]

## Supporting Information

# Fluorescence resonance energy transfer-based DNA framework assembled split G-quadruplex nanodevices for microRNA sensing in living cells

Gaoxing Su<sup>a,§</sup>, Min Zhu<sup>a,§</sup>, Mengting Liu<sup>a</sup>, Jianbin Pan<sup>c</sup>, Yao Zhou<sup>a</sup>,  
Hongyu Zhou<sup>d</sup>, Wei S. Zhang<sup>a</sup>, Yanli Tong<sup>b,\*</sup>, Yanyan Yu<sup>a,\*</sup>

<sup>a</sup> School of Pharmacy, Nantong University, Nantong, Jiangsu 226001, China

<sup>b</sup> Guangdong Second Provincial General Hospital, Guangzhou, Guangdong 510310,  
China

<sup>c</sup> State Key Laboratory of Analytical Chemistry for Life Science, School of Chemistry  
and Chemical Engineering, Nanjing University, Nanjing, Jiangsu 210093, China

<sup>d</sup> Institute of Environmental Research at Greater Bay Area, Key Laboratory for Water  
Quality and Conservation of the Pearl River Delta, Ministry of Education, Guangzhou  
University, Guangzhou 510006, China

§ These authors contribute equally to this work.

\*Corresponding authors:

E-mail addresses: yuyanyan@ntu.edu.cn (Y. Yu), tongh2008@126.com (Y. Tong).

## **1. Experimental details**

### **1.1 Materials and Reagents.**

Oligonucleotides used here were bought from Sangon Biotech Co., Ltd (Shanghai, China) and was purified by HPLC. MiRNA (mir-122a) was synthesized by TaKaRa (Dalian, China). DNA sequences (Supplementary Table S1) were designed with the help of the Integrated DNA Technologies. All reaction systems used Tris-acetic acid-magnesium (1×TAM) buffer (45 mM Tris -acetic acid, 7.6 mM magnesium acetate and 50 mM KCl, pH 8.0). All reagents were used as received without further purification. Diethylpyrocarbonate (DEPC) treated water and LipoHigh transfection reagent were bought from Sangon Biotech. Co., Ltd.

### **1.2 Apparatus**

UV1800PC spectrophotometer (Shanghai, China) was used to quantify Oligonucleotide. Fluorescence signals were got on a RF-5301PC (Shimadzu) spectrofluorophotometer. All DNA samples were annealed on an Applied Biosystems 96-well thermocycler. The confocal microscope images of the cells were obtained with a Leica TCS SP8 confocal laser scanning microscope. Native polyacrylamide gel electrophoresis (PAGE) of DNA were imaged with a Syngene gel imaging system under UV light.

### **1.3 Preparation of DNA framework**

DNA framework (F) was composed of C1, C2, C3, C4, C5 and C6 strands as listed in Table S1. G4-F consisted of C1, C2, C3, C4, C5, C6, C7a and C7b strands. When preparing the DNA framework or G4-F, equal amounts of the constituent

strands were added and mixed in  $1 \times$  TAM buffer and the final concentration of each strand was  $0.6 \mu\text{M}$ . The resulting mixed strands ( $0.6 \mu\text{M}$  each) were annealed in a PCR tube from  $95^\circ\text{C}$  to  $4^\circ\text{C}$  over the course of 3.5 hours to get the DNA framework or G4-F structure. 6% PAGE was used to characterize the resulting samples. The electrophoresis was proceeded in  $1 \times$  TBE buffer (89 mM Tris, 89 mM boric acid, 2 mM EDTA, pH 8.0). The gels were stained with 4S Red before imaging.

#### **1.4 Fluorometric assays**

The annealed G4-F device was first incubated with different target sequences for 1 h before the FRET signals were recorded from 530 to 750 nm at an excitation wavelength of 488 nm in a  $100 \mu\text{L}$  quartz cuvette.

#### **1.5 AFM imaging**

After incubation with  $40 \mu\text{L}$  ((3-aminopropyl) triethoxysilane, APTES) (0.5%) for 5 min, the mica was flushed by Milli-Q water, and dried by  $\text{N}_2$ .  $10 \mu\text{L}$  sample dissolved in  $1 \times$  TAM buffer was incubated for 5 min on treated mica. After flushing,  $1 \times$  TAM buffer was added to a total volume of  $100 \mu\text{L}$ . The G4-F nanodevices were scanned in a Dimension Icon (Bruker) mode for AFM imaging.

#### **1.6 Dnase I and FBS assay**

To evaluate the stability of the G4-F nanodevice,  $0.3 \text{ U/ml}$  Dnase I and 10% FBS were incubated with  $0.5 \mu\text{M}$  samples for 0, 10, 20, 30, 40, 50, or 60 min, respectively. The samples were characterized with 6 % PAGE.

#### **1.7 Cell Culture and Lysis**

Human cervical carcinoma cells (HeLa) were cultured in DMEM medium, which

was supplemented with 10% fetal calf serum, 100 U mL<sup>-1</sup> penicillin, and 100 µg mL<sup>-1</sup> streptomycin at 37°C in a 5% CO<sub>2</sub> incubator. HeLa cells (1 × 10<sup>6</sup> mL<sup>-1</sup>) were lysed via low-frequency ultrasonic wave.

### **1.8 Confocal Laser-Scanning Microscopy Imaging**

HeLa cells seeded in confocal dish (15 mm) were incubated for 24 h. After flushing three time, 160 µL DMEM with 75 nM DNA framework (1×TAM, 7 mM KCl and 7 µM) was added. After incubation for 2 h later, the cells were flushed three times to remove the probes that were not internalized by the cells. To monitor the miRNA response in cells, mir-122a sequences (140 nM) were delivered into cells with LipoHigh transfection reagent based on the manufacture's operating instruction. After flushing, the confocal laser-scanning microscopy was used to image mir-122a-loaded cells which was incubated with the corresponding DNA devices for 2 h.

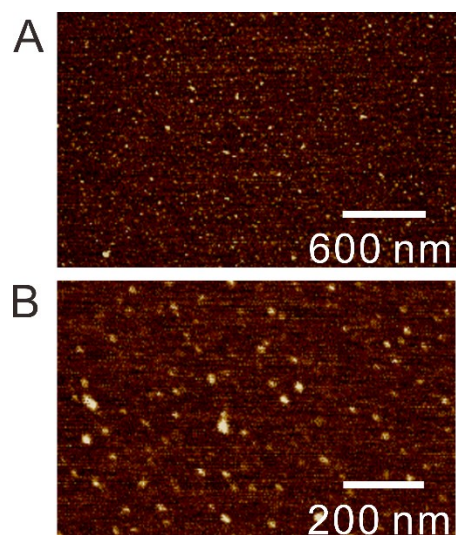

**Figure S1** AFM characterization of the DNA nanocube.

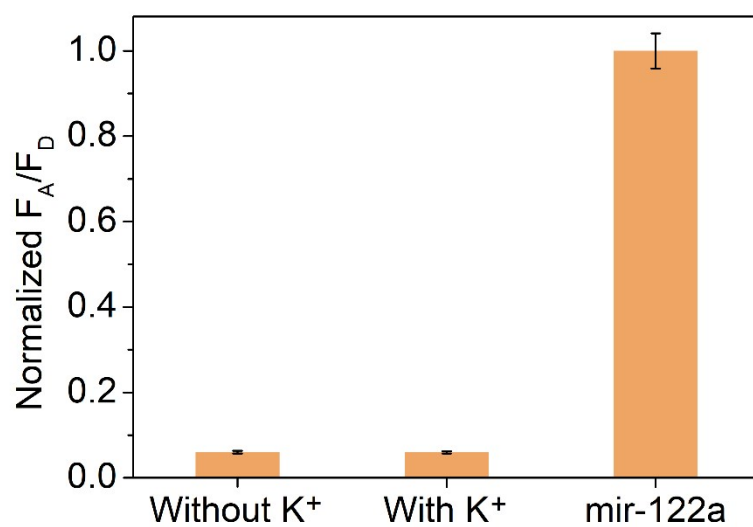

**Figure S2** Variations of  $F_A/F_D$  in different conditions. The concentration of G4-F used here was 500 nM. Without  $K^+$ : 1×TAM buffer; With  $K^+$ : 1×TAM buffer and 50 mM KCl; mir-122a: 1×TAM buffer and 50 mM KCl with 250 nM mir-122a.

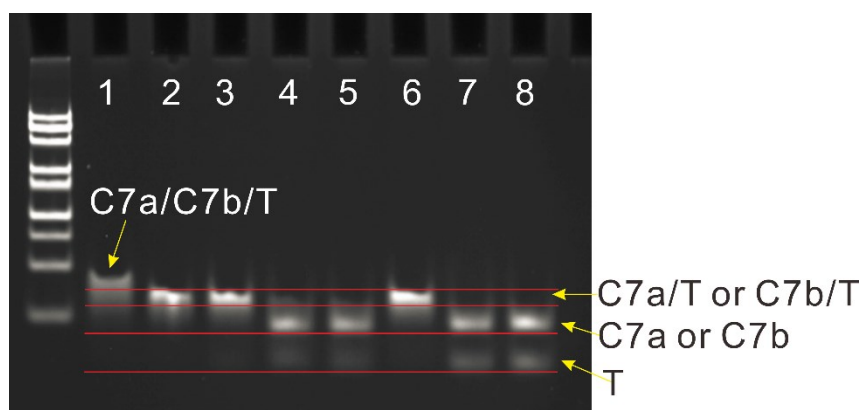

**Figure S3** The PAGE characterization for hybridization results of target and spurious strands (T) with G4 segments (C7a and C7b). From lane 1 to lane 8: mir-122a, M4, M8, M15, M19, M4-8, M4-8-15, Random.

**Table S1.** All the oligonucleotides used in this work.

| Name           | 5'-3'                                                                     |
|----------------|---------------------------------------------------------------------------|
| <b>C1</b>      | CCAGCCGCCGTTCTCCTGGATCCAAGGCTCTAGGTGGTCATT<br>CAGGTAAGTGGCCATCCAAGCTGCGA  |
| <b>C2</b>      | CCACTCCCGTTTCTGGGATGCCATACTCTAACTCAGATTGCT<br>GATTCTGAATGACCTTTAGCGTTGGCT |
| <b>C3</b>      | GATAAGGATTTAGGTCTGCCCTTTCGCAGCTTGGATGGCCAC<br>TTTTTCAGCGAATCTGAGTTAGAGT   |
| <b>C4</b>      | GAGACAGCCAGGAGAAATCAAACAGAGGCCGCATGCTGGGG<br>CCGTACAGTTCCACAAAGGCATCCCAG  |
| <b>C5</b>      | AATCCTTATCTTTGCGGCCTCTTCCGTATATTCACGAAAAGG<br>AGTTCGGCGGCTGGTTGGGCAGACCTA |
| <b>C6</b>      | CTCCTTTTCGTGAATATACGGTATTGATTCTCCTGGCTGTCT<br>CTTACGGGAGTGGAGCCAACGCTA    |
| <b>C7a</b>     | TGGAAGTGTACA TGAAA CAAACACCATT TTTGGGTAGGG-<br>Cy3                        |
| <b>C7b</b>     | Cy5-GGGTTGGGTTT TCACACTCCA TGAAAATTGGATCCAGG                              |
| <b>mir-122</b> | UGGAGUGUGACAAUGGUGUUUG                                                    |
| <b>M4</b>      | UGGUGUGUGACAAUGGUGUUUG                                                    |
| <b>M8</b>      | UGGAGUGAGACAAUGGUGUUUG                                                    |
| <b>M15</b>     | UGGAGUGUGACAAUCGUGUUUG                                                    |
| <b>M19</b>     | UGGAGUGUGACAAUGGUGAUUG                                                    |

|                |                                                   |
|----------------|---------------------------------------------------|
| <b>M15</b>     | UGGAGUGUGACAAU <b>C</b> GUGUUUG                   |
| <b>M4-8</b>    | UGG <b>U</b> GUG <b>A</b> GACAAUGGUGUUUG          |
| <b>M4-8-15</b> | UGG <b>U</b> GUG <b>A</b> GACAAU <b>C</b> GUGUUUG |
| <b>Random</b>  | AACTATACAACCTACTACCTCA                            |
